# Supplementary material for: Lysozyme adsorption on carbonaceous nanoparticles probed by second harmonic light scattering
Source: Royal Society of Chemistry journal article supplement (doi:10.1039/d3cp03511e), 2023-01-01
Supplement: d3cp03511e1.pdf [file d3cp03511e1.pdf]

## Electronic Supplementary Information

### Lysozyme Adsorption on Carbonaceous Nanoparticles Probed by Second Harmonic Light Scattering

Sourav Saikia<sup>b</sup>, Jyoti Dutta<sup>b</sup>, Akriti Mishra<sup>c</sup>, and Puspendu Kumar Das<sup>a\*</sup>

[a] Department of Inorganic and Physical Chemistry

Indian Institute of Science, Bangalore 560012, India, Email: pkdas@iisc.ac.in

[b] Department of Inorganic and Physical Chemistry

Indian Institute of Science, Bangalore 560012, India,

Email: souravsaikia@iisc.ac.in

jyotidutta@iisc.ac.in

[c] Department of Chemistry, Aarhus University, Langelandsgade 140

8000 Aarhus C, Denmark

#### Table of Contents

|                                                               |   |
|---------------------------------------------------------------|---|
| S1. Synthesis of CNP.....                                     | 2 |
| S2. TEM, UV-Vis, ATR-IR, and zeta potential measurements..... | 2 |
| S3. Elemental analysis.....                                   | 4 |
| S4. Concentration calculation of CNP.....                     | 5 |
| S5. Incident laser power dependence of the SH signal.....     | 7 |
| S6. Monochromator scans of the SH signal.....                 | 8 |
| S7. Temperature dependent SHLS data.....                      | 8 |
| S7. References.....                                           | 9 |

## **S1. Synthesis of CNP**

CNPs were synthesized from glucose and NaOH by hydrothermal method <sup>1</sup>by taking them in 10:1 ratio (w/w) and dissolving in 15 mL water. The solution was then placed in a 100 mL autoclave which was heated at 250°C for 12h (CNP-1) and 2 h (CNP-2) in an oven. The reaction mixture was then allowed to cool to room temperature to obtain a dark brown solution of CNPs which was then filtered using a syringe filter (0.2µm) followed by 30 min centrifugation at 2500 rpm. The supernatant containing CNPs was collected and characterized.

## **S2. TEM, UV-Vis, ATR-IR, and zeta potential measurements**

For TEM sample preparation, the supernatant solution containing CNPs was sonicated for 5 min and, thereafter, 20 µL of the solution was drop-casted on a carbon coated copper grid (200 mesh). The grid was dried in a desiccator for 24 hr. The TEM histograms were made by taking size distribution of around 600 particles using the digimizer software.

For UV-Vis measurements, diluted solution of CNPs was taken in a 1 mL quartz cuvette and the spectrum was collected in the wavelength range of 200-800 nm. IR measurements were carried out in a Bruker spectrometer in an ATR cell. For IR spectral measurements, freeze dried samples were taken and the spectra recorded from 4000 to 500 cm<sup>-1</sup>. Zeta potential (ZP) measurements were done in a Horiba SZ-100 nanoparticle analyzer instrument. For ZP measurement, 600 µL of the CNP solution was taken in a carbon electrode cell.

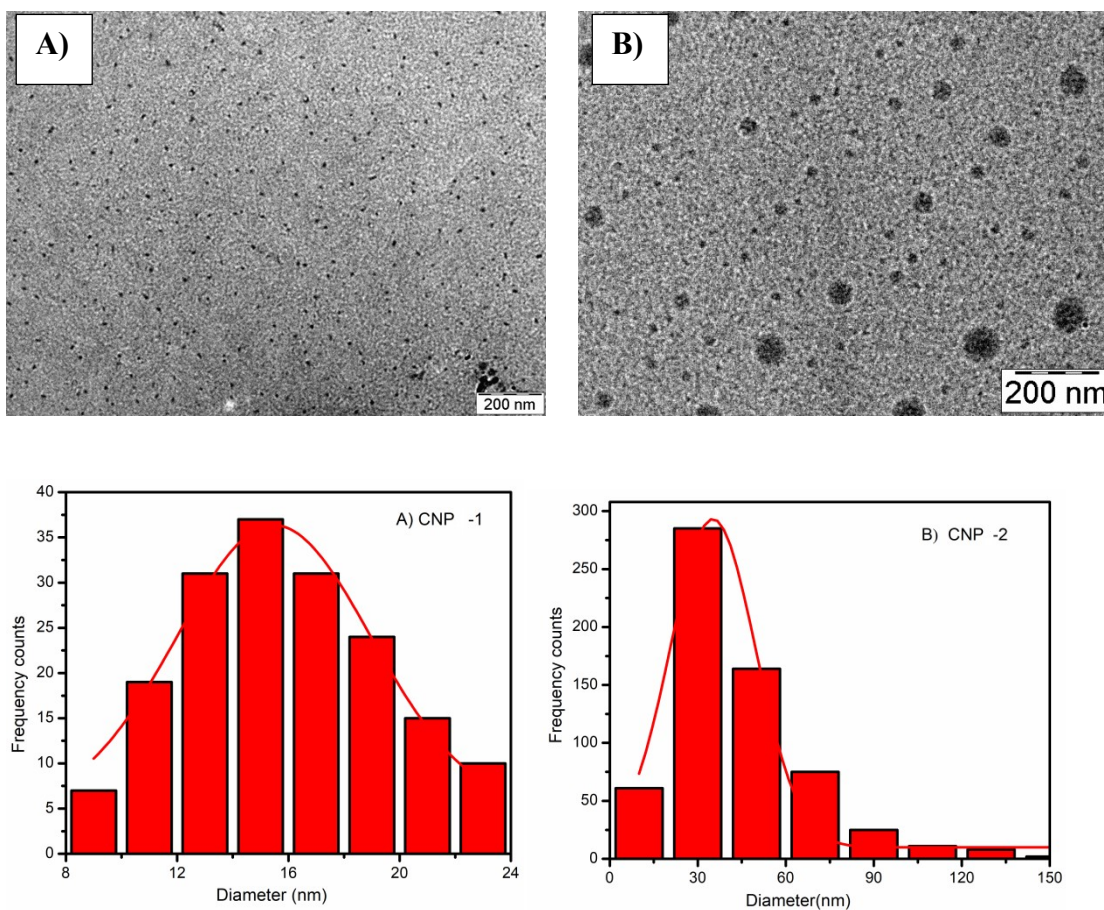

**Fig. S1.** TEM images and size distribution histograms of A) CNP-1, and B) CNP-2.

**Table S1.** Zeta potential (ZP) data of CNP in water.

| CNP   | Zeta potential (mV) |
|-------|---------------------|
| CNP-1 | $-27.3 \pm 2.8$     |
| CNP-2 | $-20.3 \pm 1.9$     |

**Table S2.** Peak assignments of ATR-IR spectra of CNP-1 and CNP-2

| CNP-1                               |                          | CNP-2                               |                          |
|-------------------------------------|--------------------------|-------------------------------------|--------------------------|
| Peak wavenumber (cm <sup>-1</sup> ) | Assignment               | Peak wavenumber (cm <sup>-1</sup> ) | assignment               |
| 3264                                | O-H stretch              | 3264                                | O-H stretch              |
| 2976                                | C-H stretch              | 2942                                | C-H stretch              |
| 2942                                | C-H stretch              | 1779                                | C=O stretch              |
| 1695                                | C=O stretch              | 1716                                | C=O stretch              |
| 1573                                | C=C stretch              | 1589                                | C=C stretch              |
| 1413                                | C-O-H bend               | 1417                                | C-O-H bend               |
| 1325                                | C-O stretch              | 1357                                | H-C-H bend               |
| 1075                                | C-O-C bend /C-O stretch  | 1071                                | C-O-C bend /C-O stretch  |
| 924-650                             | H-C-H out-of-plane bends | 772-650                             | H-C-H out-of-plane bends |

### S3. Elemental analysis

Elemental analysis was done on a Thermo Scientific Flash 2000 organic elemental analyser.

The percent composition of each element obtain from elemental analysis is given in the following table.

**Table S3.** Elemental analysis of CNP

| CNP   | % C | % H | % O (Calculated) |
|-------|-----|-----|------------------|
| CNP-1 | 37  | 5   | 58               |
| CNP-2 | 39  | 5   | 56               |

#### S4. Concentration calculation of CNP

The concentration calculations for CNP were done assuming that CNP consist of graphitic unit cell as reported previously <sup>2,3</sup>. One graphitic unit cell consists of 4 carbon atoms and unit cell dimensions are a=2.46 and h=6.71 Å.

$$\text{Concentration in mol L}^{-1} \text{ of CNP} = \frac{\text{Number of moles of CNP}}{\text{Volume in L}}$$

Number of moles of CNP in given weight of lyophilized powder

$$= \frac{\text{Number of CNPs in the given weight of lyophilized powder}}{\text{Avogadro Number}}$$

Number of CNP in given weight of lyophilized powder

$$= \frac{\text{Number of carbon atoms in the given weight of lyophilized powder}}{\text{Number of carbon atoms in one CNP}}$$

Number of carbon atoms in the given weight of lyophilized powder

$$= \frac{(\text{Weight of lyophilized powder})(\text{Avogadro Number})}{\text{Average Molecular weight}}$$

The CNP consists of C, H, O and not purely carbon, however it is difficult to determine the arrangement of the C, H and O in the CNP. The elemental analysis details the percentages of C, H and O in the CNP. Thus, we used percentage composition of C, H and O in CNP to obtain an average molecular weight value including contributions from C, H and O.

$$\text{Average molecular weight} = \frac{[(\%C)(12) + (\%O)(16) + (\%H)(1)]}{100}$$

It was assumed that unit cell consists of entity with the average molecular weight calculated above instead of pure carbon. Thus, calculated average molecular weight value was used instead of atomic weight of C for calculating number of C atoms in given weight of CNP.

Number of C atoms in one CNP (n) = (4) (n<sub>g</sub>)

Where, number of C atoms present in each graphitic unit cell = 4

and n<sub>g</sub> is number of graphitic unit cell present in one CNP

Number of graphitic unit cell present in one CNP (n<sub>g</sub>) =  $\frac{\text{Volume of one CNP}}{\text{Volume of graphitic unit cell}}$

Volume of one CNP =  $\frac{\pi d^3}{6}$  where, d = average diameter of CNP determined from TEM

Volume of graphitic unit cell<sup>4</sup> =  $\frac{\sqrt{3}ha^2}{2}$  where, a = 2.46 and h = 6.71 Å

The CNP solutions with known concentrations were used to make a calibration plot and the molar extinction coefficient (ε) for the CNP was determined using equation.

$$A = \epsilon Cl$$

A = absorbance values at 268 nm for CNP-1 and 2 respectively

C = concentration of the solution

l = path length of the sample

**Table S4.** Molar extinction coefficients of CNPs at 268 nm.

| CNP   | Size of CNP (nm) | Extinction coefficient (M <sup>-1</sup> cm <sup>-1</sup> ) |
|-------|------------------|------------------------------------------------------------|
| CNP-1 | 15 ± 4           | 1.72 x 10 <sup>7</sup>                                     |
| CNP-2 | 35 ± 17          | 3.23 x 10 <sup>8</sup>                                     |

The calculated molar extinction coefficient values were used to determine the concentration of CNP solution obtained after hydrothermal reaction. The CNP solution obtained after hydrothermal reaction was used as a stock solution to prepare solutions with different concentrations.

### S5. Incident laser power dependence of the SH signal

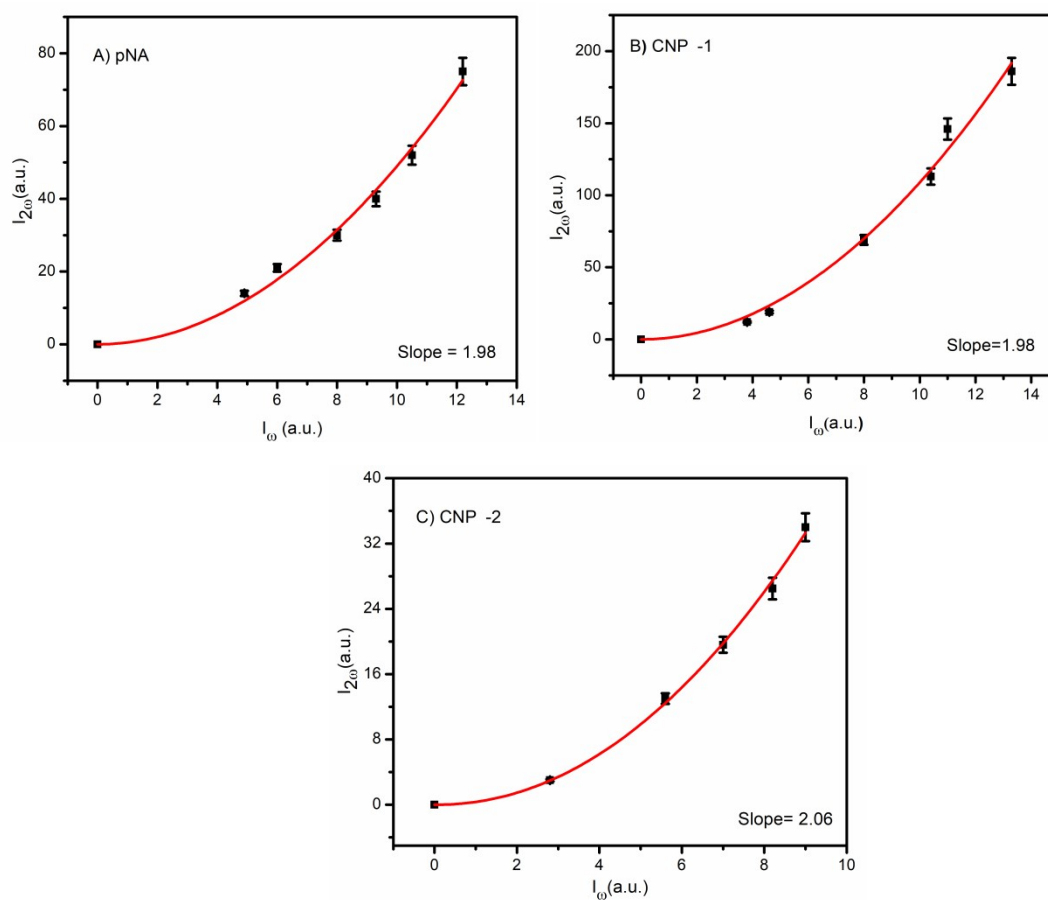

**Fig. S2.** Power dependence plots of A) pNA, B) CNP-1, and C) CNP-2. The plots show the quadratic dependence of SHLS signal with respect to incident laser intensity.

## S6. Monochromator scans of the SH signal

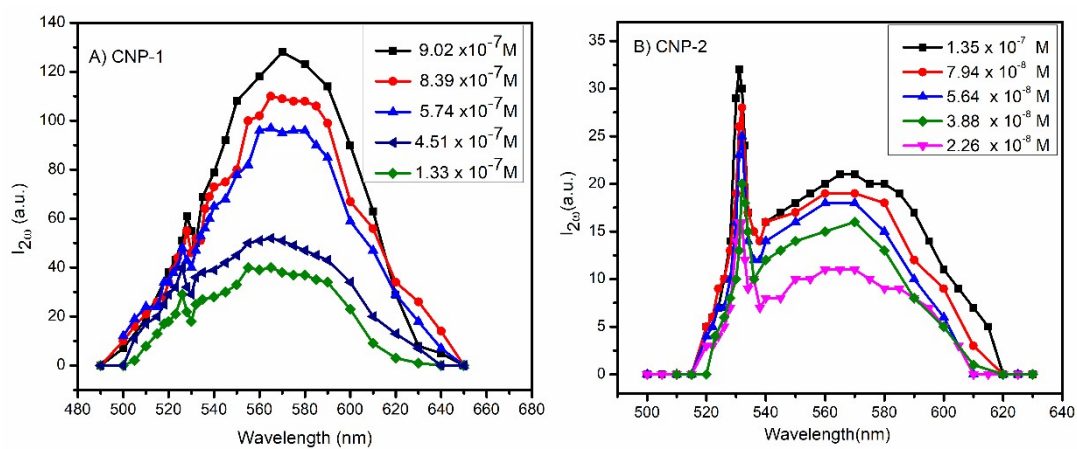

**Fig. S3.** Monochromator scans at different concentrations of A) CNP-1, and B) CNP-2

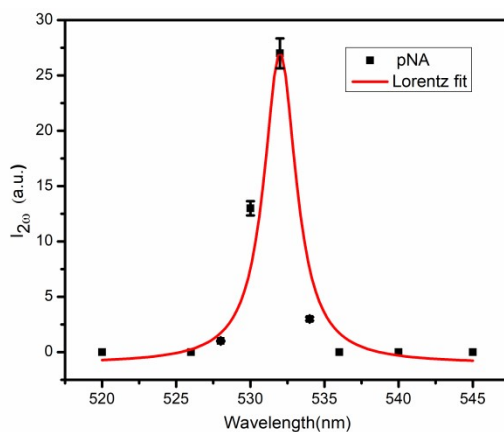

**Fig. S4.** Monochromator scan of pNA in water-methanol mixture

## S7. Temperature dependent SHLS data with MLM fitting



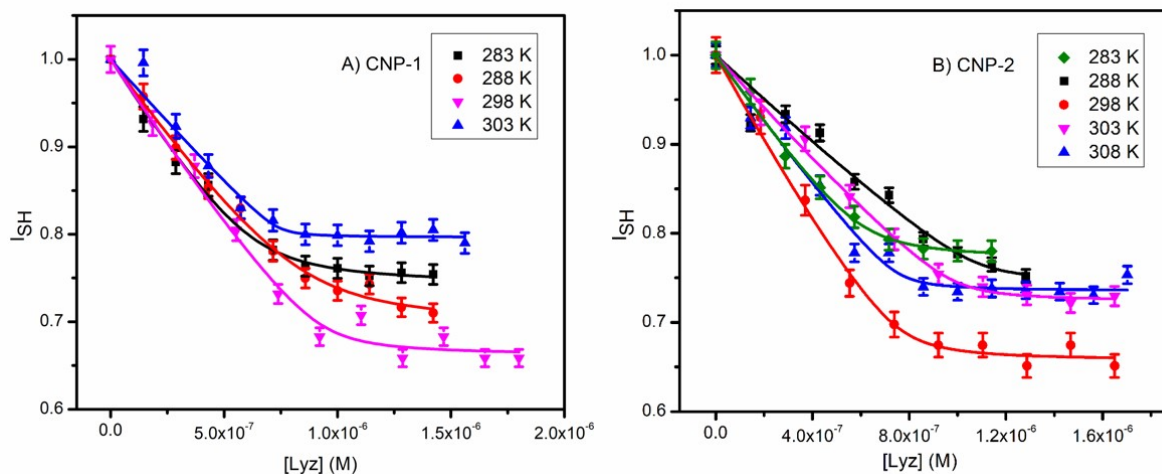

**Fig. S5.** Temperature dependent SHLS data of Lyz adsorption on CNPs. Lines through the data points are MLM fits.

## References

- 1 X. He, H. Li, Y. Liu, H. Huang, Z. Kang and S. T. Lee, Water soluble carbon nanoparticles: Hydrothermal synthesis and excellent photoluminescence properties, *Colloids Surfaces B Biointerfaces*, 2011, **87**, 326–332.
- 2 M. Perikala and A. Bhardwaj, Engineering Photo-Luminescent Centers of Carbon Dots to Achieve Higher Quantum Yields, *ACS Appl. Electron. Mater.*, 2020, **2**, 2470–2478.
- 3 S. Ghosh, H. Ali and N. R. Jana, Water Dispersible Red Fluorescent Carbon Nanoparticles via Carbonization of Resorcinol, *ACS Sustain. Chem. Eng.*, 2019, **7**, 12629–12637.
- 4 J. D. Bernal, The Structure of Graphite. Proceedings of the Royal Society of London. Series A, Containing Papers of a Mathematical and Physical Character, *Proc. R. Soc. Lond. A*, 1924, **1**, 1123–1125.
